# Supplementary material
Source: MDPI journal article supplement (https://www.mdpi.com/1999-4907/11/4/415)
Supplement: s1 [file s1]

**Supplementary materials**


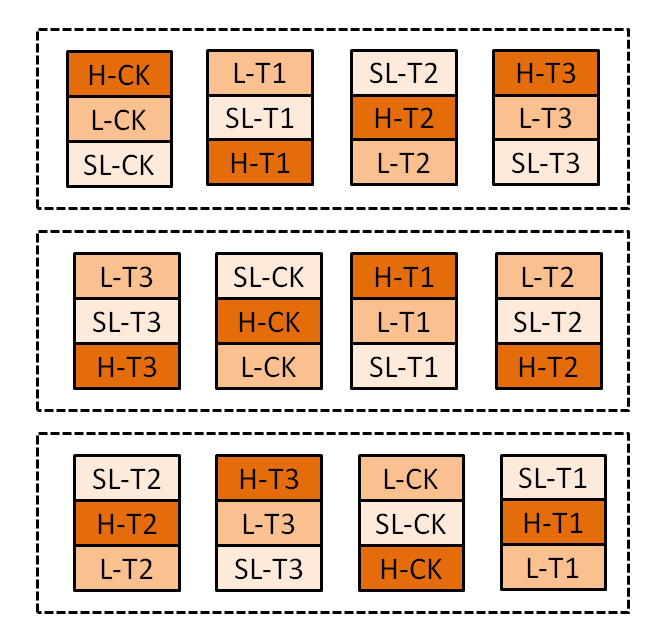


**Figure S1.** A schematic map of the field experimental treatments. H, Humus; L, Loam; SL, Sandy-Loam; CK, Control; T1, light drought; T2, moderate stress; T3, severe stress. Each of these treatments has 3 replicates in different three blocks. The drought plots have been subjected to continuous stress since 17 July, 2017. Three species were designed according to this, respectively.
